# Supplementary material for: New nanomaterials for the improvement of psoriatic lesions
Source: Royal Society of Chemistry journal article supplement (doi:10.1039/c3tb20476f), 2013-01-01
Supplement: c3tb20476f.pdf [file c3tb20476f.pdf]

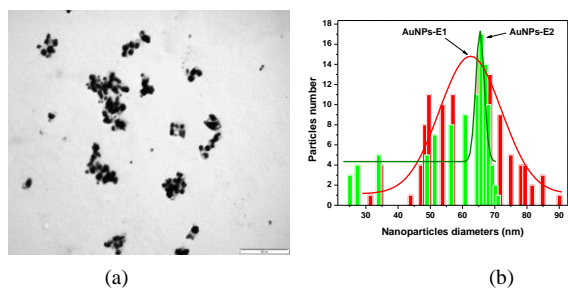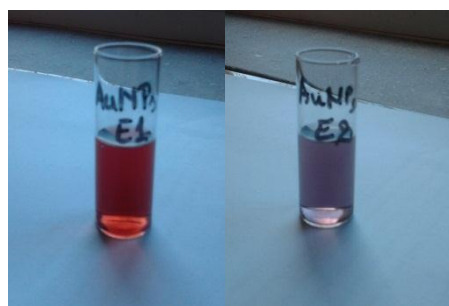

Fig. S1 TEM image of AuNPs-E2-scale bare 500 nm (a); Histograms of gold nanoparticles obtained with E1 /E2 (b); prepared nanomaterials (c)

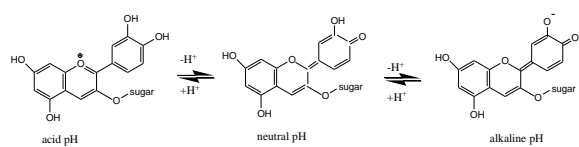

Fig. S2 Formulas for major compounds (anthocyanins) from the natural extracts at different pHs

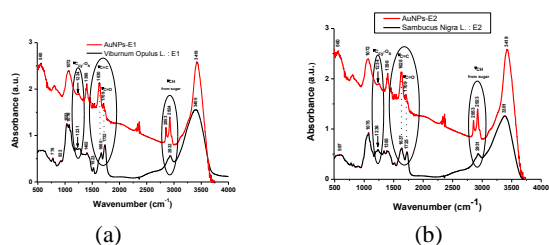

Fig. S3 FT-IR spectra of nanomaterials (a, b)

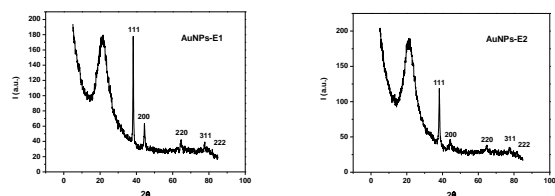

Fig. S4 X-ray spectra of nanomaterials based on gold and natural extract (E1/E2).

| Element | Weight% | Atomic% |
|---------|---------|---------|
| C K     | 8.96    | 53.62   |
| O K     | 3.19    | 14.32   |
| Au M    | 87.85   | 32.06   |
| Totals  | 100.00  |         |

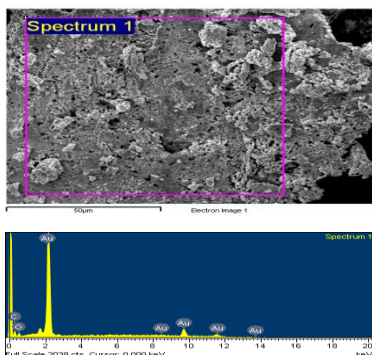

Fig. S5 EDX of AuNPs-E1

| Element | Weight% | Atomic% |
|---------|---------|---------|
| C K     | 10.22   | 65.12   |
| Au M    | 89.78   | 34.88   |
| Totals  | 100.00  |         |

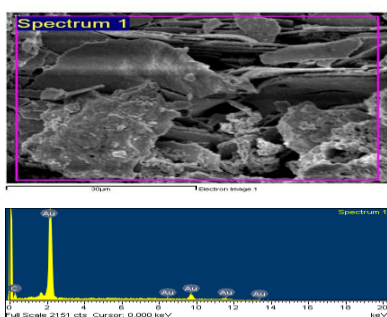

Fig. S6 EDX of AuNPs-E2

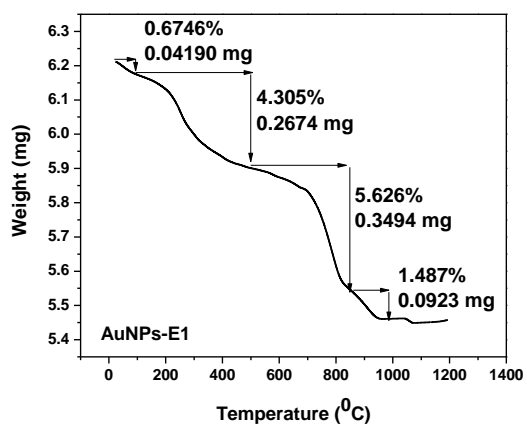

Fig. S7 TGA profile of AuNPs-E1 decomposition.
